# Supplementary material for: Epigenomics of conventional type-I dendritic cells depicted preferential control of TLR9 versus TLR3 response by NCoR1 through differential IRF3 activation
Source: Cell Mol Life Sci. 2022 Jul 18;79(8):429. doi: 10.1007/s00018-022-04424-w (PMC9293861; doi:10.1007/s00018-022-04424-w)
Supplement: Supplementary file 8 — Table S1: Excel file having list of genes specific to CpG, pIC, common between CpG and pIC, synergistic and antagonist genes in combined CpG+pIC identified based on differential expression analysis of Control CpG and pIC stimulated cDC1 DCs. (XLSX 57 KB) [file 18_2022_4424_MOESM8_ESM.xlsx]

## Sheet: CpG specific
Troap
Tmem176b
Ptk2b
Ddt
Zdhhc6
Sema3b
Zfp703
St3gal6
Cacna1g
Bcl11a
Ksr1
D330050G23Rik
Klk1
Il19
Gm12505
Ncan
Atp2a3
Eva1a
Scn1b
Acer2
Klk1b8
Pecam1
Myl4
Gm4961
Bcat1
Gm11532
Cd72
Ppfibp2
Tro
Grwd1
Igf2bp2
Ttll2
Nkain1
Wdr77
Ccl1
Fyb
Tspyl3
Rpp40
Rtn2
Ptprf
Pik3cg
Tcp10a
Psma6
Lmnb2
Robo4
Ms4a7
Hck
Sp6
Necap1
5730403I07Rik
Osgin2
AI506816
Cyb5r3
Tmem198b
Pla2g6
Foxn3
Pou2f2
Adgrb2
Klhl13
Hs3st1
Gstt1
Gstm2
Tm4sf5
Pim2
Arl6
AW046200
Klk1b11
C1qc
C1qa
Enpep
Nos2
Sh3bp5
Plbd2
Il1b
Mrps27
Trp73
Grap2
Cth
Epop
Ggt1
Ccr4
Gstt2
Agpat3
Rdh13
Pwp2
S1pr1
C2
Lhfpl2
Ces2d-ps
Lrp11
C1qb
Bcl2l15
Ssh3
Slc2a3
Pltp
P2ry2
Fcrl1
Wfdc17
Slamf1
1110032F04Rik
Klk1b1
Kirrel3
Insm1
Dph1
Chst14
Gramd1a
Il10
Ifrd2
Csf2rb2
Tent5c
Afap1l2
Mgll
Plgrkt
Enthd1
Irf4
Lipg
Txlnb
Trmt61a
Nfkbiz
Cyth3
Il18
Fbxl22
Tsr1
Dcxr
Gpr152
Gp6
Rhov
Lzts2
Trpm4
Epb41l4b
Ddx11
Rassf4
Ticam2
Smyd1
Cabp4
C2cd4c
Tnfrsf9
Clec4a2
Adra2a
Gm5861
Il12a
Gadd45b
Iqcn
Fcer1g
Ikbke
Lss
Fam129b
A930006I01Rik
Car2
Msx3
Pdgfrb
Hrc
Speer1
Plk3
Tlr2
G0s2
Slc11a2
Bcl2l11
Zfp428
D17H6S56E-5
Otof
4931428F04Rik
Stfa2
Cd79b
Stra6
Bco2
Fam72a
Rtl5
Vsir
Casr
Pofut1
Adgre1
Nr4a1
C3ar1
Gstm6
Cspg5
Lpl
Il1bos
Cables2
Suox
Tmem134
Klk1b16
Ppfia3
Epcam
Blnk
Gramd2
Il7r
Hnf1b
Tmem176a
Ms4a6d
Gpc1
Radx
Zfp593
Gm19510
Batf
Slc6a11
Spn
Serpine2
Bcam
Cavin1
Mfsd2a
Cacna1s
Fabp1
Ky
Sephs2
Zfp599
Spns2
Mapk6
Ddx56
Gm6455
Erg28
Pdzk1ip1
Smyd5
Ccl4
Vgf
Mab21l3
Elf3
Tha1
Cebpd
Npr1
Garem2
Abcc3
Iqsec2
1700003M07Rik
Sod3
Krt222
Rcc1l
Socs3
Cd209f
Bcorl1
Apoa2
Utf1
Mir9-3hg
Fcmr
Tbc1d10a
Spns3
Igfbp4
Smpd3
Rhbdf1
Mir21a
Ptprh
Gfi1b
Klk1b22
Gm11166
4930552P12Rik
P2rx1
Nrtn
Ripor3
Cdc42ep1
Cd19
Cldn4
Furin
Ppm1n
D630003M21Rik
Adamts4
Gstt4
Gstt3
BC049352
Plcd1
Gatd3a
Slc6a8
Gpr18
Irf2bpl
Ehf
Astl
Cfb
Ccl9
Ccl3
Scnn1a
Gnat3
Klk1b9
Sh2d2a
Dusp1
Heatr6
Fbxl15
Tcp10b
Thnsl2
Cd209g
Ubash3a
Pdcd1lg2
Tslp
Plppr2
Ccl6
4933404O12Rik
Coro1b
Ms4a6c
Tsku
Srp54b
Cpd
Ms4a4a
Asrgl1
Acat2
Man1a
Noc4l
Fam83d
Ifitm5
Rac2
Sla
H2-Q10
Lgmn
Fah
Dhx40
Cd9
Apbb1ip
Siah2
Rasl11a
Denr
Ipo4
Snai1
Clec4a1
Egln2
Sh3tc2
Pigz
Prorp
Ccl17
Unc93a
Flacc1
Prdm1
P2ry6
Ptgs2
Klk15
Foxh1
Gm15987
Il1rn
Zfp811
Gstm1
Gcg
A430093F15Rik
Dusp2
Mex3b
Ptpn1
2410002F23Rik
9030025P20Rik
Cyth4
Ltbp3
Cd5l
Lcn2
Ier3
Snord83b
Cd207
Exoc3l
Synpo2
Rnf43
Btbd16
Fam107b
Lrrc25
Bcl3
Tarm1
Ifitm2
Pwp1
Nexmif
Nelfe
Mylk
Nlrp6
Prmt7
F830208F22Rik
Rgs9bp
C1ql4
Nle1
Slc2a13
Ndrg4
Kndc1
Ces2c
Prkab2
Acad9
Wfdc21
Rnf149
Shisa3
Gm14137
Shq1
Zc3h12a
Tagap
Ifnlr1
Dnajc22
Gm19723
Mroh2a
1700028J19Rik
Tmc3
Pla2g4d
Chst7
Gm266
Zfp964
Flvcr2
Unc93a2
Olfr1033
Shc2
Gpr31b
Hcar2
Rsad1
Stard5
B4galnt4
Mybbp1a
Hip1r
Pdgfb
Muc3

## Sheet: Common CpG and pIC
1810013L24Rik
Med1
Gpcpd1
Cdk6
Runx2
Itgal
Apol7e
Cd2bp2
Cbwd1
Mapkapk2
Stat5b
Stat5a
Nup98
Xpo6
Mybl2
Cutc
Pik3cd
Lpp
Bcar1
Rnf34
Exoc3l4
Rufy3
Gtf2h3
Slc15a3
Med21
Mrps7
Pde4dip
Gpr84
Adam17
Hap1
Tec
Hspb1
Zfp275
Ccr7
Sertad1
Bclaf3
Pkib
Rhbdl3
Cbfa2t3
Srrm1
Tdpoz1
Cldn1
Fchsd2
Traf3
Mon1b
Enox2
Slc26a2
Zfp809
Nox1
Smox
Nol4l
Cmc2
Dip2b
Srgap2
Ghitm
Pde4b
Plekhg4
Tnrc6a
Capn5
Ctla4
Mtmr14
4930432K21Rik
Sec23b
Taf1a
Zfp119a
Utp3
Ifi27
Whrn
Ikzf1
Fdft1
Mthfsl
Mpp2
Ccdc149
Bcl2l1
Uros
Fmnl1
Tle4
Zgpat
Icosl
Pgghg
Cebpb
Morf4l2
Dgkh
Tpbg
Gpr19
Gm16712
Bet1l
Kansl1l
Ppif
Itgb5
Fbxw11
Rcl1
Gm9895
Jdp2
B3gnt5
Klhl3
Fbxw5
Zfp513
Smcr8
Dglucy
Zfp458
D130020L05Rik
Jund
Etv3
Hmgcs1
Sptb
Nfya
Tnfrsf11a
Chrnb2
Cd8a
Prpf31
Large1
Camkk2
Tmed1
Ppdpf
Nudt17
Mthfs
Taf7
Adss
Clec12b
H3f3b
Mgat4a
Prr5l
Vav2
Pstpip2
Senp8
Igbp1
Sema7a
Zfp119b
Tbc1d15
Tdpoz8
Kdm5c
Vwa7
Cxcl16
Ep400
3010003L21Rik
Gpbp1
Rbpms
Traf2
Kif21b
Herpud1
Ezr
Mbtd1
Zmynd15
Fnbp1
Smarce1
Aamdc
Gm12253
Pla2g4f
Slc20a2
Adm
Kansl3
Id1
Zbtb18
Myo5b
Grk3
Rgs9
Pfkfb1
Mdn1
Grina
Mllt6
Khnyn
Map3k14
Insl6
Nck2
Gcm1
Plekho2
Hsph1
Csf2rb
Kctd13
Sart3
Sbno1
Ms4a4b
Hk2
Gtpbp1
Igsf9
Ppp1r3f
Snx11
Zfand3
Sh3pxd2a
Zfand2a
Cd274
Bmp8a
Rnf4
Rhof
Slc1a2
1500015A07Rik
Mbd1
Ccdc120
Osmr
Clec2i
Adam8
Glcci1
Alas1
Cct3
Zbtb5
Celsr3
Cbln3
A330035P11Rik
Gm6654
2310043L19Rik
Yju2
Tas1r3
Txnrd1
Ncf1
Trub2
Alkbh1
Cx3cl1
Arhgap35
Cd40
Il12b
Ext1
Washc1
Adamtsl4
Sms
Tcof1
Gpx3
Rptor
Stk19
Slc16a6
Srcap
Arfrp1
Dnajc7
Hc
B4galt5
Car13
Elp1
Ccnl2
Fbxl12
Arrb2
2010300C02Rik
Gsr
Ube2f
Eml2
Pgap2
Nsun6
Kit
Asb2
2310001H17Rik
9330179D12Rik
Ift57
Mob1b
Cpne3
C3
Shc4
Gmeb2
Slc2a4
Adam19
Map1lc3a
Rabgef1
Son
Ifi27l2a
Cptp
Myom1
Med12
Rbpj
Tm9sf4
Spsb1
Arv1
Dusp12
Ahnak
Ldhc
Aen
Cand1
Tomm70a
Pgd
Il6
Itga5
Suco
Ddx6
Gpr65
Fam126a
Plaur
Zfr
Faah
Map3k8
Dxo
Rras2
Psmf1
Tnfaip2
Gpr85
Cd209c
Urgcp
Stimate
Elp5
Slc9a8
Mtmr12
Amn
D730005E14Rik
Lnx2
Hnrnpa0
Mif4gd
Zfp949
9130230L23Rik
Slc9a3r1
Med13
Chst2
Wasl
Tarbp2
A630001G21Rik
Il1a
Fgr
Dcaf1
Galnt7
Maff
Psg16
Eef1akmt4
Mrc2
Adam23
Ppp1r10
Ccdc173
Nfkbia
Srrm2
4930459C07Rik
Tsacc
Polr3a
Pim1
Ccr2
2500002B13Rik
Pggt1b
Ehd1
Nup62
Ncoa5
Tdpoz4
Ptpn2
Ly6a
Fbrs
Kpna4
Ccnt1
Trim43b
Mmd
Serpinb1a
BC024978
Apobec1
Cdc42ep2
Zfand5
P2rx5
Swap70
Irf9
Anxa1
Pmvk
Srxn1
Olfm2
Kcnh4
Zfp366
Ttpal
Ebi3
Ms4a6b
Ndrg1
4833419F23Rik
Tgs1
9430037G07Rik
Tyk2
Bahd1
Gga3
Bcl2a1d
Bcl2a1b
Wars
Bcl2a1a
Cd44
Sbno2
Cmya5
1700025B11Rik
Zfp36
Nsun3
Ninj1
Dync2h1
Gosr2
Tcn2
Fam49a
Fam122a
Jade3
Fut8
Rhoc
Abcc1
Golga1
Lyn
Hspa2
Slc31a2
Acot7
Mob3a
Gm1943
Pdzd11
Srgn
Pik3r6
Wdr59
Tet2
Jade2
1700008J07Rik
2900097C17Rik
Pitpnm1
Slc39a1
Wee1
Acp5
Spred1
Rexo4
Slc12a3
Tnf
Rab20
Rab10
Dpp4
Gcnt4
M6pr
Ltb
Hsd17b7
Mirt1
Ly75
Baz1a
4930513N10Rik
Kdm4a
Cdc37
Bcat2
Supv3l1
Fbxo11
Bcl10
Hmcn2
Upf1
Kcna3
Atp7a
Psme2
Psme1
Cox18
Lncpint
Ube2d-ps
Supt6
Ier5
F11r
Tank
Kctd16
Pik3ap1
Mcemp1
1700052K11Rik
Akr1a1
Rab10os
Phf19
Poglut1
Ddx24
Ifitm3
Mfsd6l
Ptpn23
F2r
Cdk1
Mettl2
Sgk3
Sik3
Supt4b
Notch1
2310015A10Rik
Kctd14
Pogk
Dusp5
Trp53inp2
Clk3
Gpr137b
Depdc7
Rap2a
Nfkb1
A430035B10Rik
Camk2n1
Ankrd17
Dot1l
Flnb
Dlgap3
Mcl1
Cd69
Josd1
Zfp296
Nek8
Hes7
Riok3
Rictor
Laptm4b
Rnd1
Slirp
Usp20
Tmprss4
Tbl1x
Sh3bp4
Ndnf
Intu
Il17d
Maged1
Lipe
Ybey
4833438C02Rik
Vash1
Myo1d
Zbtb40
Heg1
Cep85l
Zfp791
Gpr52
Ifitm6
Itpkc
Trib1
E130311K13Rik
Tcp11l1
Tdpoz2
Ube2z
Iqcb1
Pik3r5
Abtb2
Arhgap20
Myh10
Plekhm2
Tmem151b
Tbc1d17
Eno4
Mylip
E230013L22Rik
Bmt2
Zhx2
Cblb
Zfp213
Heca
Sdhaf1
Maf
Scube3
Dennd4a
Onecut2
Hook2
Slc25a47
Fscn1
Mrpl39
Prpf38a
Fam89a
Rrad
Nsun4
Ift88
Cox17
Kdm6b
Otulin
Morrbid
Rftn1
Smap2
Smim40
Nup85

## Sheet: pIC Specific
0610039K10Rik
0610043K17Rik
1110002J07Rik
1600014C10Rik
1700030J22Rik
1700065D16Rik
1810026B05Rik
4930431F12Rik
4930470H14Rik
4930503L19Rik
4930523C07Rik
4932438A13Rik
4933406J09Rik
4933412E12Rik
4933432I03Rik
5430405H02Rik
5430437J10Rik
5830408C22Rik
9130015A21Rik
9330175E14Rik
9930021J03Rik
9930111J21Rik1
9930111J21Rik2
A030001D20Rik
A3galt2
A530032D15Rik
A530040E14Rik
A530064D06Rik
A630001O12Rik
A630012P03Rik
A730017L22Rik
A930013F10Rik
A930037H05Rik
Aanat
Abca17
Abcb1a
Abcg1
Abcg4
Abhd12b
Acer1
Acod1
Acoxl
Acsl1
Actb
Actn1
Actr2
Adamts1
Adap1
Adap2
Adar
Adcy6
Adcy9
Adgb
Adgrg6
Aebp2
Afap1
Aftph
Agap1
Ahr
AI837181
Aida
Aim2
Aire
Ak9
Akap13
Akt3
Alpk2
Als2
Amer1
Amigo3
Amn1
Ankfy1
Ankmy1
Ankrd12
Ankrd33b
Ankrd42
Ankrd55
Anxa2
Anxa3
Anxa7
Ap3m2
Apaf1
Apod
Apof
Apol11b
Apol7a
Apol7b
Apol7c
Apol9a
Apol9b
Apon
Arap2
Arc
Arel1
Arfgef1
Arhgap28
Arhgap30
Arhgap8
Arhgef12
Arhgef2
Arhgef3
Arhgef40
Arid3a
Arid4a
Arl4c
Arl5a
Arl5b
Arl5c
Arrdc4
Arsi
Art2a
Art2b
Art3
Asap1
Asap3
Asb13
Asprv1
Atl3
Atm
Atp10a
Atp10d
Atp2b1
Atp6v1d
Atr
Atrx
Atxn1
Atxn7l1
AW011738
Axdnd1
Axl
Azi2
B2m
B430306N03Rik
Bace1
Bach1
Barx2
Batf2
Bbc3
Bbx
BC051226
BC147527
Bcl2l14
Bcl9
Bhlhe40
Bicdl2
Birc2
Bmp2
Bmp2k
Brdt
Bst2
C130026I21Rik
C130046K22Rik
C5ar1
C5ar2
C920009B18Rik
Cacnb3
Cacnb4
Calb2
Calm1
Car7
Card19
Carhsp1
Cask
Casp3
Cass4
Cast
Castor2
Casz1
Catsperg1
Cc2d2a
Ccdc122
Ccdc141
Ccdc184
Ccdc191
Ccdc6
Ccdc88b
Ccdc96
Ccnd2
Ccng2
Ccnl1
Ccnyl1
Ccr3
Ccrl2
Ccser2
Cd1d1
Cd200
Cd63
Cd70
Cd80
Cd82
Cd83
Cdc42bpg
Cdh15
Cdh5
Cdk14
Cdk19
Cdk5r1
Cdkl3
Cdkn1a
Cdkn1b
Cds1
Cdyl
Cdyl2
Cend1
Cep162
Cep350
Cfap43
Cfap53
Cgas
Chd1
Chd2
Chrna5
Cish
Cited2
Clasp2
Clcf1
Clec2d
Clic4
Clip1
Clip2
Cln3
Cmip
Cmpk2
Cnp
Cntln
Col25a1
Col27a1
Col5a3
Col6a5
Col9a3
Coro2a
Cpeb3
Cpne9
Creb3l4
Crebl2
Crebrf
Crem
Crlf3
Crxos
Crybg1
Crybg3
Csf1
Csnk1g1
Csrnp1
Csrp2
Cst7
Ctnnal1
Ctrc
Cttnbp2nl
Cxcl10
Cxcl11
Cxcl2
Cxcl9
Cxcr5
Cybb
Cyth1
Cytip
D130040H23Rik
D1Ertd622e
D5Ertd579e
D6Ertd527e
Dapp1
Daxx
Dcaf6
Dcbld2
Dcdc2c
Dck
Dcp2
Ddhd1
Ddx4
Ddx58
Ddx60
Dek
Dennd1b
Dennd3
Dennd5a
Diaph2
Dkk2
Dlg2
Dll1
Dmbx1
Dmtn
Dnah6
Dnaja1
Dnaja2
Dnajc13
Dnase1l3
Dnd1
Dnmt3a
Dnmt3l
Dock8
Dock9
Dok1
Dop1b
Dpf3
Dqx1
Dram1
Dscaml1
Dthd1
Dtx3l
Dubr
Duoxa2
Dusp8
Dyrk4
E130102H24Rik
E130307A14Rik
E330023G01Rik
Ece1
Edem1
Efhd1
Efhd2
Efna2
Ehd4
Eif2ak2
Elf1
Ell3
Emp3
Eps8l2
Espn
Etnk1
Etnk2
Extl1
F2rl1
Fabp7
Fam114a1
Fam129a
Fam20a
Fam241a
Fam53c
Fam83c
Fap
Fas
Fbn1
Fbxo27
Fbxo40
Fcgr4
Fcrlb
Fer1l6
Ffar2
Ffar4
Fgf2
Fgf6
Fgfr3
Fgl2
Filip1l
Fkbp9
Flt4
Fmnl2
Fnbp1l
Fndc3a
Foxa1
Foxf1
Foxp4
Fpr2
Frmd4a
Frmd4b
Frmd5
Fsd1l
Fut2
Fyco1
Fzd5
G530011O06Rik
Gata3
Gbp2
Gbp2b
Gbp3
Gbp4
Gbp5
Gbp6
Gbp7
Gbp8
Gbp9
Gca
Gch1
Gcsam
Gdap10
Gdf11
Gjb2
Gje1
Glipr2
Gm10432
Gm12185
Gm12250
Gm13807
Gm15133
Gm16617
Gm16675
Gm19345
Gm1966
Gm21188
Gm32200
Gm3230
Gm34746
Gm45521
Gm4759
Gm4951
Gm527
Gm5431
Gm614
Gm6548
Gm6637
Gm7609
Gm8773
Gm8979
Gna13
Gnb4
Gng12
Gng4
Gnrhr
Golga3
Got1
Gpd2
Gpr157
Gpr33
Gpr35
Gpr87
Gprc5a
Gprc5c
Gramd1b
Gramd3
Grasp
Gripap1
Grk1
Gsap
Gsdmd
Gtpbp2
Gucd1
Gypc
H2-D1
H2-Eb2
H2-K2
H2-Q1
H2-Q6
H2-T10
H2-T22
H2-T23
H2-T24
Hamp
Hcn3
Hdc
Heatr9
Helz2
Herc3
Herc6
Hivep1
Hk3
Hlx
Hmgn3
Hopx
Hpca
Hpcal4
Hpse
Hsh2d
Hspa1a
Hspa1b
Hspa1l
Htr7
Htra2
Icos
Idi2
Ido1
Ido2
Iffo2
Ifi202b
Ifi203
Ifi204
Ifi205
Ifi206
Ifi207
Ifi208
Ifi209
Ifi211
Ifi213
Ifi214
Ifi44
Ifi47
Ifih1
Ifit1
Ifit1bl1
Ifit1bl2
Ifit2
Ifit3
Ifit3b
Ifnb1
Ifnl2
Ifnl3
Ifrd1
Igtp
Iigp1
Ikbkb
Il10ra
Il12rb1
Il15
Il15ra
Il21r
Il23a
Il27
Il2ra
Il2rg
Il4ra
Il7
Ildr1
Ilrun
Inf2
Inka1
Ino80d
Ino80dos
Inpp5b
Ints4
Iqgap1
Irak2
Irf1
Irf2
Irf7
Irgm1
Irgm2
Isg15
Isg20
Itga4
Itgb1bp2
Itgb8
Itprid2
Jag1
Jak2
Jak3
Jam2
Jaml
Jarid2
Jchain
Jmjd1c
Kalrn
Kat6a
Kbtbd2
Kcnab1
Kcnk6
Kcnn1
Kdr
Kif1b
Klf11
Klf6
Klrk1
Kpna3
Ktn1
Kynu
Lacc1
Lag3
Lap3
Larp1
Lck
Lct
Letm2
Lgals3bp
Lgals9
Lhx2
Lif
Lilr4b
Lilrb4a
Lin54
Lnpep
LOC101055843
LOC108167347
Loxl3
Lrch3
Lrp8
Lrrc63
Lrrfip1
Lrrk1
Ltbp1
Ly6m
Ly96
Lyve1
Lztfl1
M1ap
Macc1
Mafk
Malt1
Mamstr
Map1b
Map2k1
Map3k12
Map4
Map4k4
Mapkapk3
Marchf5
Marcksl1
Max
Mbd2
Mbp
Mcur1
Mdm2
Mdm4
Med12l
Meis3
Met
Mex3c
Mga
Mid1
Mier3
Mir155hg
Mir22hg
Mir6385
Misp
Mitd1
Mitf
Mkrn1
Mks1
Mlkl
Mmp24
Mmp25
Mndal
Mob3c
Mocos
Morc3
Mov10
Mpp1
Mpzl2
Mreg
Mrgpra6
Mtf1
Mthfr
Mtm1
Mtmr11
Mtmr4
Mul1
Mx1
Mx2
Mxd1
Mycbp2
Myd88
Myo18b
N4bp1
Naa20
Nampt
Nbeal1
Nbl1
Nckipsd
Ncoa7
Ndrg2
Nectin2
Nectin4
Nedd4l
Nes
Net1
Nfkbid
Nfkbie
Nid1
Nipal1
Nktr
Nlgn2
Nlrc4
Nlrc5
Nmi
Nod1
Nod2
Npas2
Npc2
Npepps
Nr1d2
Nr4a2
Nr4a3
Nr6a1
Nrde2
Nrip1
Nrip3
Nsd3
Nt5c1a
Nt5c3
Nuak2
Nub1
Nudt9
Nupr1
Nxf1
Oaf
Oas1a
Oas1b
Oas1c
Oas2
Oas3
Oasl1
Oasl2
Obsl1
Ogdhl
Ogfrl1
Olfml2a
Olfr433
Olfr856-ps1
Oprd1
Optn
Orm3
Otud1
P2rx4
P2ry10
P2ry13
Pabpc1
Pacsin1
Pank2
Panx1
Papss2
Paqr8
Parp10
Parp11
Parp12
Parp14
Parp3
Parp4
Parp9
Pax5
Paxbp1
Pced1b
Pcgf5
Pcp4
Pde2a
Pdlim1
Pdlim4
Pdp2
Pdzrn4
Peak1
Peli1
Perm1
Pfkfb3
Pfkp
Pglyrp2
Phf11a
Phf11b
Phf11c
Phf11d
Phf20
Phip
Phlda2
Phldb1
Phlpp1
Pi4k2b
Pla1a
Pla2g4c
Plaat3
Plagl1
Plat
Plekha2
Plekha4
Plekhn1
Plin2
Plk2
Plod3
Plppr4
Pls1
Pmaip1
Pml
Pnp
Pnp2
Pnpt1
Pnrc1
Polb
Pou3f1
Pou6f1
Ppm1k
Ppp1r15a
Ppp4r1l-ps
Ppp4r2
Prdm9
Prelid2
Prex1
Prkcd
Prkx
Prmt2
Procr
Prrg4
Psme2b
Pstpip1
Ptafr
Ptger4
Ptk6
Pttg1ip
Pvr
Rab11fip1
Rab21
Rab22a
Rab29
Rab8b
Ramp3
Rap1b
Rap2c
Rapgef2
Rasa2
Rasa4
Rasd1
Rasgef1b
Rasip1
Rassf2
Rbbp8
Rbm47
Rbms1
Rbms2
Rbpms2
Rcsd1
Rdh8
Reep3
Relb
Rest
Rfc3
Rhou
Rilpl1
Rin2
Ripk2
Rnaset2b
Rnf135
Rnf152
Rnf19b
Rnf213
Rnf214
Rngtt
Rragd
Rsad2
Rtp4
Ryr2
Samd5
Samd9l
Samhd1
Samsn1
Sass6
Satb2
Sav1
Sbds
Scaper
Scin
Scn2b
Scn4b
Scnn1g
Sco1
Sdc4
Sdcbp2
Sdsl
Sec24b
Selenow
Selplg
Sema4a
Sema4f
Serinc5
Serpina3f
Serpina3g
Serpinb6b
Serpinb9
Serpinb9b
Serpinc1
Serpine1
Sertad2
Sesn2
Setbp1
Setdb2
Sez6l2
Sfmbt1
Sfr1
Sfxn2
Sgcb
Sgk1
Sh2d5
Sh3bp2
Sh3kbp1
Shfl
Shisal1
Sidt1
Sinhcaf
Sirpa
Sirt1
Skil
Slamf7
Slc15a1
Slc22a21
Slc23a2
Slc25a22
Slc25a25
Slc25a38
Slc2a6
Slc49a4
Slc4a3
Slc4a4
Slc6a6
Slc7a11
Slfn1
Slfn10-ps
Slfn2
Slfn3
Slfn4
Slfn5
Slfn8
Slfn9
Smad3
Smad4
Smchd1
Smg7
Snn
Snx2
Snx4
Socs1
Socs2
Sowahc
Sowahd
Sp100
Sp110
Sp140
Spata6
Specc1
Spib
Spop
Sppl2a
Spta1
Spty2d1
Src
Srms
Srsf12
Ssc4d
Ssc5d
Ssh1
St6galnac2
St8sia2
Stap2
Stard3
Stat1
Stat2
Stat3
Stat4
Stk39
Stk4
Stoml1
Strip2
Stx16
Stxbp1
Stxbp3
Sult6b1
Susd2
Svbp
Syna
Syngr2
Synj1
Tacr2
Tagln
Taok1
Tap1
Tapbp
Tapbpl
Tasor2
Tbc1d1
Tbc1d32
Tbc1d4
Tbc1d8
Tcf7
Tdg
Tdrd7
Tent4a
Tent5a
Tgfb2
Tgif1
Tgtp1
Tgtp2
Thbs4
Tigit
Timd4
Timeless
Tktl1
Tlcd2
Tle3
Tlk2
Tlr9
Tmem106a
Tmem123
Tmem131
Tmem170
Tmem171
Tmem184b
Tmem200b
Tmem229a
Tmem243
Tmem266
Tmem35b
Tmem39a
Tmem63b
Tmem67
Tmem87b
Tmie
Tmod2
Tmod3
Tmtc2
Tnfaip3
Tnfaip8l3
Tnfrsf13b
Tnfsf10
Tnfsf9
Tnr
Tnrc18
Tor1aip1
Tor1aip2
Tor3a
Tox3
Tpk1
Tpr
Trafd1
Trim12a
Trim12c
Trim14
Trim25
Trim26
Trim30a
Trim30b
Trim30d
Trim34a
Trim34b
Trim35
Trio
Triobp
Trp53
Trp53inp1
Trps1
Tspan2
Tspan3
Tspo
Tssk3
Ttc7
Ttll9
Ttyh2
Tuba1a
Tuba8
Tut4
Tvp23a
Txndc17
Tyro3
Uap1
Uba6
Uba7
Ube2l6
Ubxn2a
Unc45b
Unc80
Upk1a
Upp1
Usp15
Usp18
Usp22
Usp25
Usp27x
Usp40
Utrn
Vav3
Vcam1
Vcan
Vcpip1
Vegfa
Vmn2r3
Vmn2r84
Vps54
Vwa3b
Washc4
Wdfy1
Wdr37
Wnt11
Xaf1
Xcr1
Xdh
Xiap
Xrn1
Yes1
Ypel5
Zbp1
Zbtb10
Zbtb32
Zc3h12d
Zc3h6
Zc3h7a
Zc3hav1
Zcchc2
Zfhx4
Zfp217
Zfp456
Zfp488
Zfp607b
Zfp62
Zfp800
Zfp827
Zfp872
Zfp987
Znfx1
Zscan29
Zup1

## Sheet: Synergy Genes
Cdk5r1
Stat5a
Mybl2
Aanat
Ksr1
Gm12505
Ncan
Scn1b
Ccr7
Bclaf3
Pvr
Rhbdl3
Myl4
Gm4961
Obsl1
Gm11532
Nol4l
Ifi202b
Capn5
Tro
Ttll2
Ifnl3
Whrn
Anxa2
Zbtb10
Robo4
Sp6
Ppif
Phlda2
Ahr
Tnfrsf11a
Il2ra
Cd8a
Slamf7
Adss
Espn
Hdc
Sh3bp5
Vcan
Fut2
Sema7a
Trp73
Tdpoz8
Cth
Ccr4
Spta1
Iffo2
Shisal1
S1pr1
Smarce1
Cish
Pla2g4f
Adm
P2ry2
Fcrl1
Gprc5c
Kirrel3
Gcm1
Afap1l2
Ptafr
Irf4
Tigit
Snx11
Sh3pxd2a
Cd274
Rnaset2b
Bmp8a
Gp6
Ddx11
Osmr
C2cd4c
Crxos
Cd63
Il12b
Il12a
Sdc4
Ppp1r15a
Ikbke
Fam129b
A930006I01Rik
Kdr
Hc
Hrc
Plk3
Car13
G0s2
Rhou
Dpf3
Slc2a4
Cspg5
AW011738
Spsb1
Ahnak
Ppfia3
Ly96
Il27
Srsf12
Il6
Dok1
Fam126a
Plaur
Faah
Map3k8
Batf
Slc6a11
Spn
Serpine2
Bcam
Cavin1
Scnn1g
Amn
Pdzk1ip1
Ccl4
Vgf
Slc9a3r1
Npr1
Tyro3
Garem2
9130015A21Rik
Iqsec2
Ccdc173
Krt222
Apoa2
Nr4a3
Plat
Fcmr
Tdpoz4
Igfbp4
Tmem200b
Rhbdf1
Trim43b
Serpinb1a
Cdc42ep2
Serpine1
Nid1
Itgb8
Anxa1
Pmvk
Nrtn
Ebi3
Cdc42ep1
Ndrg1
Cldn4
Lhx2
Dscaml1
Nudt9
Adamts4
Gstt4
Ninj1
Kcnn1
Slc6a8
Tcn2
Mmp24
Tnfrsf13b
Loxl3
Ccl3
Wdr59
Acp5
Dusp1
Tnf
Gcnt4
Ubash3a
Tslp
Cxcl2
Srp54b
H2-Q10
Cd9
Alpk2
Hamp
Ifnb1
Samd5
Slc49a4
Hspa1a
Hspa1b
Sh3tc2
Cxcr5
Cd70
Ptgs2
Upk1a
Foxh1
Il1rn
Gdf11
Zfp827
Procr
Extl1
Kctd14
9030025P20Rik
Cd5l
Oaf
Zbtb32
Camk2n1
Ier3
Synpo2
Dlgap3
Rdh8
Dennd3
Ifnl2
Zfp296
Il23a
Hes7
Olfml2a
Rnd1
Sdcbp2
Mylk
Fgf2
F830208F22Rik
Slc2a13
Tmtc2
Shisa3
Gm14137
Mamstr
Abtb2
Unc45b
Mroh2a
Idi2
Plekhm2
Zhx2
Pla2g4d
Heca
Scube3
Zfp964
Flvcr2
Olfr1033
Plagl1
Fscn1
Shc2
Fam83c
Kdm6b
Muc3
Adgrg6

## Sheet: CpG Antagonist Genes
Pgap2
Tec
Ifitm6
Stk19
Wasl
Asrgl1
Hmcn2
Bet1l
Zbtb18
Bmt2
Ccr2
Cpne3
A630001G21Rik
Pik3r6
9130230L23Rik
Srgap2
2310043L19Rik
Slc11a2
Rasl11a
Med21
Glcci1
Il17d
Ms4a6c
Tagap
Kansl1l
Chrnb2
Cabp4
Hap1
BC024978
Aen
P2rx1
Nr4a1
Gm19723
Ssh3
Epb41l4b
Otulin
Adgrb2
Vav2
Cd209c
Arv1
Cd72
Plppr2
Bcl2l15
Pwp1
Ccl1
Cdc37
Zfp458
Pigz
Tdpoz2
Hnf1b
Nelfe
Srxn1
Rac2
Zdhhc6
Dpp4
Lzts2
C2
Tmem198b
Rab10os
Il1bos
Csf2rb
Slc16a6
Gm1943
Gtf2h3
1700028J19Rik
Maff
Ipo4
Gm6455
Prorp
Zfp593
Pou2f2
Gpr18
Gm11166
Prdm1
Cebpb
Lgmn
Zfp703
Cfb
Gramd2
2410002F23Rik
Fah
Rrad
Tmem134
Gpr31b
Ms4a6d
Fyb
Ppm1n
Atp2a3
Rdh13
Nle1
Coro1b
Car2
AW046200
Tmem176a
Ptpn1
Rtl5
Tgs1
Abcc3
D630003M21Rik
Klk1b11
Apol7e
D330050G23Rik
Wdr77
Lss
Lpl
Radx
Dph1
Mgll
1700003M07Rik
Cables2
Gpx3
Ky
Adra2a
Nox1
Itgal
Osgin2
Gpr152
5730403I07Rik
Ifrd2
Tmem176b
Fam83d
Fam72a
Irf2bpl
Tle4
Adgre1
Klk1b9
Gatd3a
Btbd16
Acat2
Cpd
Trmt61a
Il10
Klk1b1
Klk1b8
Tlr2
Ms4a7
4933404O12Rik
Cd69
Klk1b16
Scnn1a
Rsad1
Pdgfrb
Sephs2
Mir21a
Ldhc
Tspyl3
Man1a
Tha1
Klk1b22
Pim2
Ms4a4a
Agpat3
Cd209f
Ms4a6b
Myo1d
AI506816
Sla
Kndc1
Necap1
Vsir
Ticam2
Pla2g6
Enpep
Sptb
Ly6a
Lyn
Il19
Ces2d-ps
Slc31a2
Ces2c
C3ar1
Gnat3
Cd209g
Cyth4
Clec4a1
2010300C02Rik
C1qc
Stard5
C1qb
Cebpd
Herpud1
2310015A10Rik
Lrrc25
Tmc3
C1qa
Slc12a3
Cldn1
St3gal6
F2r
Cd207
Slc2a3
Gpr137b
Clec4a2
Asb2
Adam23

## Sheet: pIC Antagonist Genes
Mfsd6l
B3gnt5
Chst2
Smap2
Bcar1
4930513N10Rik
Pdzd11
Rab10
Gm6548
Arrb2
Zfp809
Smim40
Anxa3
Sbno1
1700008J07Rik
Stat1
Trim30a
A430035B10Rik
Dram1
Pggt1b
Vwa3b
Oas1a
Mid1
Sbno2
Irf7
Syna
Hmgcs1
Tbc1d8
Zfand3
Baz1a
Psme2b
Cd82
H2-D1
Rptor
Atr
Runx2
Gm19345
Zc3hav1
Eif2ak2
Rap2a
Pdp2
P2rx4
Parp14
Tdg
Vcpip1
Cd1d1
D730005E14Rik
Tomm70a
Ddhd1
Ifi27l2a
Mcl1
Zbp1
Fap
Slc2a6
Pnpt1
E130307A14Rik
Zfp488
Adamts1
Oas3
Arhgef3
Pik3ap1
Tdpoz1
Vps54
Sowahd
Npas2
Rnf213
Slc25a47
Apol7c
Mier3
Slfn8
Icosl
Son
Igsf9
Fyco1
Prrg4
Ncoa7
Uba7
Tasor2
Fnbp1
Rnf214
Sav1
Lilr4b
Max
Phip
Fnbp1l
Dync2h1
Dcdc2c
Tor3a
Isg20
Znfx1
Lgals3bp
Fbrs
Gm8979
Gpr84
Gch1
Rest
Trim34a
Lpp
Cbfa2t3
Zc3h6
Afap1
Bcl9
Mx2
Usp25
Casp3
Mrgpra6
Lrch3
Tent4a
Ccnl1
Ifi214
Samd9l
Reep3
Myo18b
Pgd
Actr2
Gsdmd
Prdm9
Zfp987
Stoml1
Zfp607b
Dop1b
Serpinb9
Stap2
Arl5a
Spop
Exoc3l4
Golga1
0610039K10Rik
Kcnk6
Ripk2
Gcsam
Gm15133
Smad3
Mir6385
Jak3
Taok1
Zscan29
Tyk2
Cntln
Lrrfip1
Misp
Ppp4r1l-ps
Lrrc63
9930111J21Rik2
Il21r
Apol7b
Ccdc191
Lztfl1
Elf1
Fcgr4
BC147527
Efna2
Nedd4l
Chrna5
Bmp2
Jak2
Lnpep
Ift88
Sass6
B2m
Bcl2l14
Tmem266
Tapbpl
Spata6
Chd2
Apol11b
Dek
Kbtbd2
Dmbx1
Sms
Cep85l
Slfn5
Oas1c
Mafk
Shfl
Axdnd1
Gm1966
Hmgn3
Tmem171
0610043K17Rik
Lin54
Aim2
Tank
Frmd4a
Mkrn1
Apof
Itgb1bp2
Tnrc18
Nbeal1
Lrrk1
Emp3
Calm1
Cxcl10
Ifi206
Mitd1
Tbc1d32
Ttpal
Gosr2
Atm
Oas1b
Adgb
Cpne9
Trim34b
Arc
Txnrd1
Gbp2
D1Ertd622e
Cgas
Fbxo40
Pax5
Gbp9
Utrn
Pmaip1
Cd83
Atp6v1d
Pttg1ip
Kynu
Xcr1
Sertad2
Ogdhl
Cdkl3
Actn1
Papss2
Ppm1k
Src
Cend1
LOC108167347
Morc3
A730017L22Rik
Bmp2k
Mthfr
Arfgef1
Gm4759
Tnr
Zcchc2
Apod
Cds1
Sult6b1
Paxbp1
Trim12c
Ypel5
Cpeb3
Gm5431
Ifit2
Nectin4
Nampt
Il4ra
Mks1
Gm45521
Smchd1
Gm12250
Ankmy1
Mx1
H2-Q6
Gata3
Arel1
4932438A13Rik
Foxp4
Irgm2
Parp3
Ddx60
Tacr2
Arrdc4
Spty2d1
Jchain
Asprv1
Gjb2
Tktl1
Slfn3
Synj1
Gpr65
Crybg1
Nrde2
Gpr87
Mxd1
Col9a3
Gpd2
Abcg4
Trim35
Rnf152
Panx1
Trim12a
Crem
H2-T24
Cxcl11
Pced1b
Mmd
Lilrb4a
Adap2
Klf6
Dcp2
Wdr37
Crebl2
Ankfy1
Ifi44
Parp11
Nes
LOC101055843
Car7
Mex3c
Pde4dip
Rbm47
Sema4f
Sfxn2
Tbc1d4
Kcnab1
Vmn2r3
Tgtp2
Frmd5
St6galnac2
Gbp4
Timeless
Etnk1
Ddx4
Nckipsd
Mycbp2
Setdb2
Gm13807
Cxcl9
Dnd1
Gje1
Arhgap30
Fgl2
Gm12185
D5Ertd579e
Tmem67
Tagln
Stat4
Slc39a1
Nr1d2
Samsn1
Trim30b
Gbp3
Il15
Cfap53
Kalrn
Apol9a
Marcksl1
Lif
Slfn1
Irf2
Ddx58
Filip1l
Ifi47
Ifrd1
1110002J07Rik
Uba6
Bace1
Itprid2
Gpr33
4930503L19Rik
Ttyh2
Plaat3
Ramp3
Fam114a1
Rin2
Atp7a
Abca17
Cep162
Ifit3b
4933432I03Rik
Apol9b
Batf2
Syngr2
Mob3c
H2-K2
Cc2d2a
5430437J10Rik
Ifi213
1810026B05Rik
Fzd5
Mdm4
Fpr2
Hlx
Gm16675
Cytip
Cdyl
Gramd1b
Fbn1
Tmod2
Ctrc
Tgtp1
Dock8
Ifit3
Gm8773
Ifi208
Mlkl
Clasp2
5830408C22Rik
Ccdc141
Rsad2
Sez6l2
Paqr8
Creb3l4
E130102H24Rik
Zfp800
Gm32200
Efhd2
Atp10a
F2rl1
4933412E12Rik
Myom1
Ifi203
Diaph2
Adcy9
Gbp6
Dnase1l3
Rgs9
Serpina3g
Rtp4
Pde2a
Prkcd
9930111J21Rik1
Zfp872
Tnfsf10
Serpinb6b
Slc25a38
Dapp1
Il2rg
Arid4a
Cmpk2
Scin
Ssc5d
Pdlim4
Hpca
Apaf1
Pik3cd
Gna13
Fer1l6
A930037H05Rik
Itga4
Maf
Parp10
1600014C10Rik
Sdsl
Dkk2
Cacnb4
Tut4
Spib
Il12rb1
Slc25a25
Foxf1
Tuba8
Cdk14
Zfhx4
Phf11c
Pla2g4c
Gng4
Ogfrl1
Mtmr11
Strip2
Hopx
Art2a
Cdkn1a
Gripap1
Ly6m
Acod1
Unc80
A930013F10Rik
Dmtn
Hk3
Amer1
Hpse
Ikzf1
4933406J09Rik
Jmjd1c
Tssk3
Catsperg1
Flt4
Gbp7
Tspan2
Xdh
Bicdl2
Ccdc184
Oas2
Fgr
Cst7
Tpk1
Nod1
Fmnl2
Gdap10
Vav3
Med12l
Arhgap8
Trps1
Mgat4a
Tent5a
Cybb
Vegfa
Scn2b
Olfr433
Gm10432
Art2b
Dennd1b
Slc7a11
Pcp4
Atp10d
Agap1
H2-Eb2
A3galt2
Zfp456
St8sia2
Sidt1
Arap2
Ffar4
Col27a1
Ccrl2
Phlpp1
Iigp1
Zc3h12d
Ak9
Sh3bp2
Abcb1a
Herc3
Met
C5ar2
Duoxa2
Dlg2
Col6a5
Cdyl2
A530064D06Rik
Gnrhr
Bach1
Tmie
Got1
A630012P03Rik
Gbp8
Ltbp1
Dthd1
Sirpa
Gm614
Clec12b
Cnp
C920009B18Rik
P2ry10
Gm4951
Slc4a3
Axl
Gbp2b
P2ry13
Pglyrp2
Trp53inp1
Jarid2
Ryr2
Gsap
Rasgef1b
Klrk1
Pdzrn4
Ffar2
Zfp791
Gpr35
Slc22a21
Asap3
Jaml
Sgk1
Plekho2
Mcemp1
Ccdc88b
Lrp8
Mtm1
Cdh5
Mpzl2
Icos
Tmem229a
Nlrc4
Nod2
Sh2d5
B430306N03Rik
Dnah6
Fcrlb
Dyrk4
Onecut2
Ankrd55
Vmn2r84
Lncpint
H2-Q1
Irak2
A630001O12Rik
Cass4
Tnfaip8l3
